# Supplementary figures and images for: Spin crossover of ferric complexes with catecholate derivatives. Single-crystal X-ray structure, Magnetic and Mössbauer investigations
Source: Royal Society of Chemistry journal article supplement (doi:10.1039/b418294d), 2005-01-01

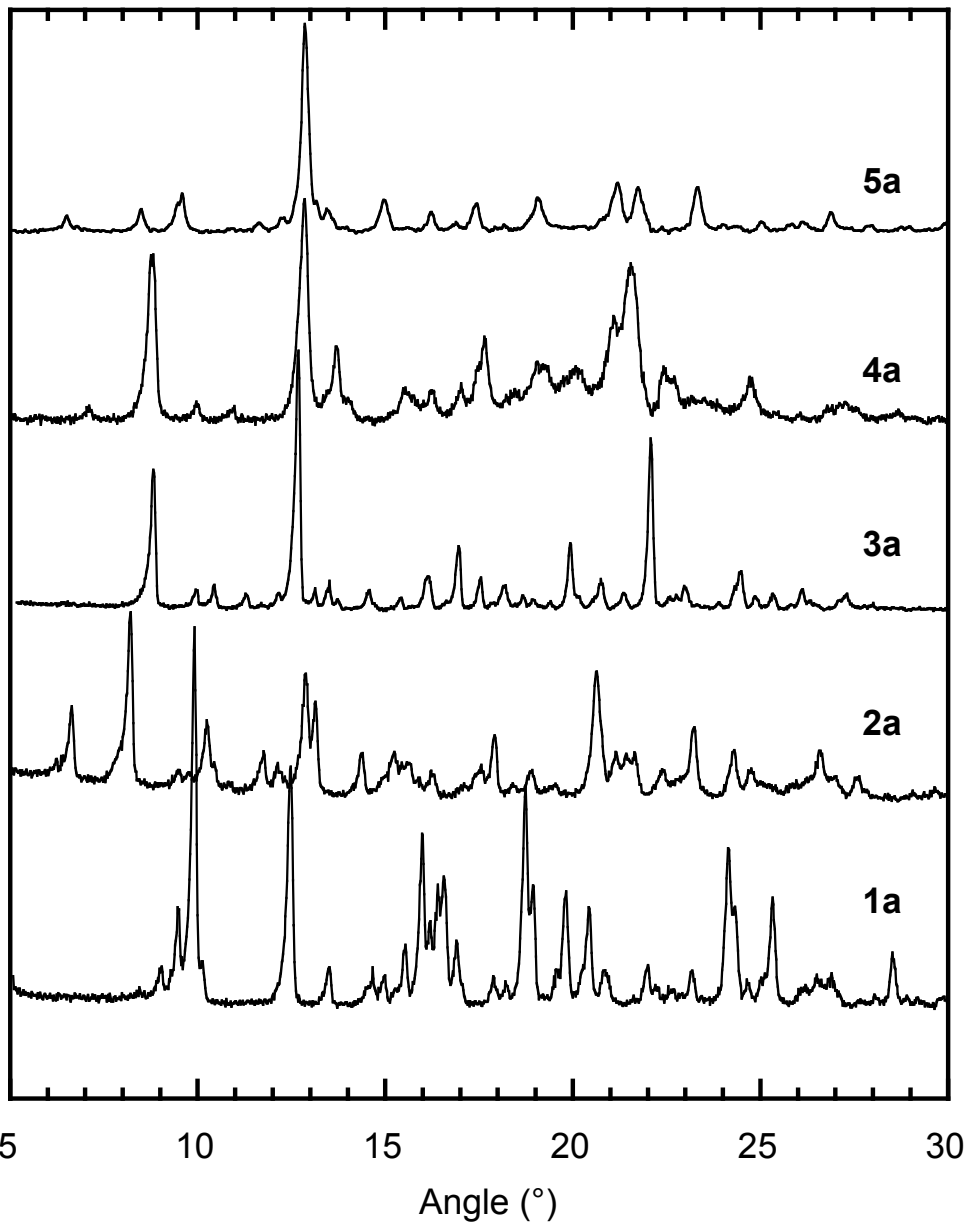

Supplement: b418294d.pdf [file b418294d.pdf]
